# Supplementary material
Source: Research Square preprint supplement (doi:10.21203/rs.3.rs-9289820/v1)
Supplement: Supplementary file 1 [file 09fa0bf097dca625b193ec73.docx]

**Supplementary materials: Stool-based genomic surveillance identifies post-engraftment expansion of multidrug-resistant pathogens in haematopoietic stem cell transplant patients in India**

**Supplementary methods:**

***Stool sample labelling***

Stool samples were anonymised with a code that represented the patient number, timepoint relative to HSCT, day relative to HSCT, and sample number from that patient. For example, P02AT0353 represents patient 2, after transplant (AT), collected on day +35, and the third sample from this patient. The blood sample IDs contained an additional code (Blood Adult – BA, Blood Paediatric – BP or Blood Venous – BV). This code was placed between the day relative to HSCT and sample number from that patient. For example, P02AT005BP2 represents a blood sample for patient 2, after transplant, collected on day +5, blood paediatric, and the second sample from this patient.

***Stool sample processing***

Up to 25g (or mL, depending on consistency) of stool was transferred from the stool collection container into sterile 50mL Falcon tubes using Pasteur pipettes. If stool consistency was very hard (Type 1 or type 2 according to the Bristol stool chart classification) (33), 1g of autoclaved glass beads were added into the 50mL Falcon tube prior to transferring stool from the collection container. Once stool was transferred, the Falcon tube(s) were tightly closed and weighed. From the total weight, the weight of the Falcon tube (13.0g (Abdos) or 13.3g (Tarsons)) was subtracted from the total weight (and 1g in addition to the tube weight was subtracted from the total weight if glass beads were added). Once the stool sample was weighed, sterile PBS was added to the Falcon tubes; the volume added was equivalent to the weight of the stool, such that the stool could be resuspended in a 1:1 ratio.

Samples were vortexed until Falcon tube contents were homogenised, and the stool was completely resuspended in PBS. To ensure sample homogenisation, the tube was shaken from time to time to move the glass beads around during vortexing. After vortexing, samples underwent a slow centrifuge at 400*g* for 10 mins at 4°C.

***Serial dilutions and plating of stool samples***

The 50mL Falcon tubes were retrieved from the centrifuge and 100μl of the supernatant was added into 900μl of sterile PBS to produce a 10x dilution. The 10x Eppendorf was closed tightly and inverted multiple times to ensure complete resuspension of the neat supernatant in the PBS. The 10x dilution was further diluted into a 100x dilution of neat stool.

MacConkey agar plates were prepared without crystal violet, so they also grew Gram-positive organisms belonging to the *Staphylococcus* and *Enterococcus* genera. Plates were labelled with the sample ID and dilution factor and 50μl of 100x dilution was pipetted onto the plate and spread using a sterile L-spreader. Inoculated MacConkey plates were incubated at 37°C overnight.

***Stool sample plate sweeps***

Following overnight incubation, 5mL of sterile PBS was added to each plate. A complete sweep of the plate was collected by resuspending any grown colonies in PBS, aspirating the resuspended culture, and transferring the plate-sweep culture aspirate into clean 15mL Falcon tubes. Then, 1mL of culture was aliquoted into each of three Eppendorf tubes – destined for DNA extraction, formalin inactivation (if eligible) and glycerol stocks (2 tubes) in trypticase soy broth.

### ***Formalin inactivation***

Stool samples collected at the nearest timepoint to a patient’s culture-confirmed BSI (n = 13) were formalin inactivated for Hi-C metagenomic sequencing. The bacterial suspension was pelleted by centrifugation at 10,000 rpm for 10 minutes at room temperature. Pellets were resuspended in 1X TE buffer using an equal volume to that of the original culture and centrifuged again; this wash step was repeated once more. The bacterial pellet was resuspended in TE buffer containing a final concentration of 2.5% formaldehyde (formalin solution). Samples were incubated at room temperature for 30 min, followed by an incubation at 4°C for 20 min. The formalin fixation reaction was quenched by adding ice-cold glycine added to a final concentration of 0.25M. The sample tubes were inverted a few times to ensure complete resuspension and incubated for 5 minutes at room temperature, followed by a 15-minute incubation on ice. The tubes were then centrifuged for 10 minutes at 10,000 rpm at 4°C. The bacterial pellet was washed twice in 2mL 1X TE and centrifuged in 2mL microcentrifuge tubes. After centrifugation, the supernatant was discarded, and bacterial pellets were frozen at -80°C.

***DNA extraction***

DNA extraction was done using the Wizard® Genomic DNA purification kit by Promega as per the manufacturer’s protocol. Briefly, 1mL overnight plate sweep aliquot was centrifuged at 13,000–16,000*g* for 2 minutes to pellet the cells. The supernatant was removed and 600*µ*l of nuclei lysis solution was added to the pellet and mixed by pipetting. The sample tubes were incubated at 80ºC for 5 minutes to lyse the cells, then cooled down to room temperature. RNAse solution (3*µ*l) was added to the cell lysates, which were then mixed by inversion. The samples were incubated at 37ºC for 15–60 minutes and then cooled down to room temperature. 200*µ*l of protein precipitation solution was added to the RNAse-treated cell lysates. Tubes were vortexed vigorously at a high speed for 20 seconds to mix the protein precipitation solution with the cell lysate. The samples were incubated on ice for 10 minutes, followed by centrifugation at 13,000-16,000*g* for 5 minutes.

After centrifugation, the supernatant containing the DNA was transferred to a clean 1.5mL microcentrifuge tube containing 600*µ*l of room-temperature isopropanol. The samples were mixed gently by inversion until thread-like strands of DNA formed. The tubes were then centrifuged again at 13,000–16,000*g* for 3 minutes. Pellets were air-dried before adding 100*µ*l of DNA rehydration solution and incubating at 65ºC for one hour, periodically mixing the solution by gently tapping the tube. The DNA was then stored in the laboratory fridge at 4ºC awaiting shipment to Cambridge.

***Antimicrobial sensitivity testing drug-bug combinations***

Gram-negative isolates were tested against Cefotaxime and Ceftazidime (third generation cephalosporins), Cefoperazone-Sulbactam (third generation cephalosporin with sulphonamide), Cefepime (fourth generation cephalosporin), Amikacin and Gentamicin (aminoglycosides), Ertapenem and Meropenem (carbapenems). Gram-positive organisms were tested against Linezolid (oxazolidinone), Ampicillin (penicillin), high-level Gentamicin (HLG; aminoglycoside) and Vancomycin (glycopeptide).

***InStrain pipeline configuration and output analyses***

The consensus genome bins extracted from the metaWRAP pipeline were used as reference genomes and dereplicated. Then, a bowtie index was built with the extracted genome bins. Next, all the quality-checked metagenomic and WGS data were mapped to the bowtie index to identify regions where reads aligned to the index. InStrain Profile was run on each resulting .bam file, using the --database-mode flag. The InStrain profile command filters .bam files to only retain reads that map with sufficient quality and >5x coverage, hence minimising mismatches and extracting unique mappings. The reads that pass these filters are considered for microdiversity analyses that calculate nucleotide diversity at each base, in addition to scaffold-level properties including coverage, and ANI between the reads and the reference genomes.

Finally, the inStrain compare function was used to produce outputs containing scaffold- (comparisonsTable.tsv) and genome-level (genomeWide_compare.tsv) comparisons of the InStrain profile objects created for each sample in the step above. The genome-level output from the InStrain compare function was used to produce a microbial network, to illustrate shared strains between patient samples The data frame containing genome-level comparisons was filtered to include only genomes that mapped with 99.999% ANI with 25% of the metagenomic reads compared to the reference index.

**Supplementary data 1: Summary of all clinically significant organisms detected post-HSCT**

| **Patient number** | **Clinically significant organism** | **Source** | **Day** |
| --- | --- | --- | --- |
| 1 | *CONS* | Blood | 64 |
| 2 | *E. coli* | Blood | 5 |
| 5 | *Enterococcus faecium* | Blood | 14 |
| 5 | *Chryseobacterium indologenes* | Blood | 27 |
| 10 | *Pseudomonas aeruginosa* | Blood | 56 |
| 14 | *Klebsiella pneumoniae* | Blood | 43 |
| 21 | *CONS* | Blood | 4 |
| 22 | *CONS* | Blood | 3 |
| 24 | *Pseudomonas aeruginosa* | Blood | 5 |
| 31 | *Klebsiella pneumoniae* | Blood | 3 |
| 41 | *CONS* | Blood | 12 |
| 43 | *CONS* | Blood | 94 |
| 44 | *Pseudomonas aeruginosa* | Blood | 12 |
| 53 | *Enterococcus faecium* | Blood | 35 |
| 53 | *Acinetobacter baummannii* | Blood | 75 |
| 53 | *Stenotrophomonas maltophila* | Blood | 91 |
| 61 | *E. coli* | Blood | 2 |
| 75 | *Klebsiella pneumoniae* | Blood | 8 |
| 79 | *Ralstonia manitolytica* | Blood | 2 |
| 81 | *Klebsiella pneumoniae* | Blood | 7 |
| 26 | *CONS* | CLABSI | 39 |
| 70 | *CONS* | CLABSI | 3 |
| 66 | *Acinetobacter baumannii* | CRBSI | 18 |
| 10 | *Clostridioides difficile* | Stool | 32 |
| 12 | *Clostridioides difficile* | Stool | 28 |
| 18 | *Clostridioides difficile* | Stool | 35 |
| 25 | *Clostridioides difficile* | Stool | 14 |
| 26 | *Clostridioides difficile* | Stool | 37 |
| 29 | *Clostridioides difficile* | Stool | 18 |
| 40 | *Clostridioides difficile* | Stool | 7 |
| 42 | *Clostridioides difficile* | Stool | 17 |
| 50 | *Clostridioides difficile* | Stool | 158 |
| 57 | *Clostridioides difficile* | Stool | 15 |
| 60 | *Clostridioides difficile* | Stool | 111 |
| 15 | *E. coli* | Urine | 8 |
| 33 | *Enterococcus faecium* | Urine | 26 |
| 33 | *Acinetobacter baummannii* | VAP | 57 |
| 83 | *Pseudomonas aeruginosa* | VAP | 6 |

**Supplementary data 2: Shannon alpha-diversity at species-level**


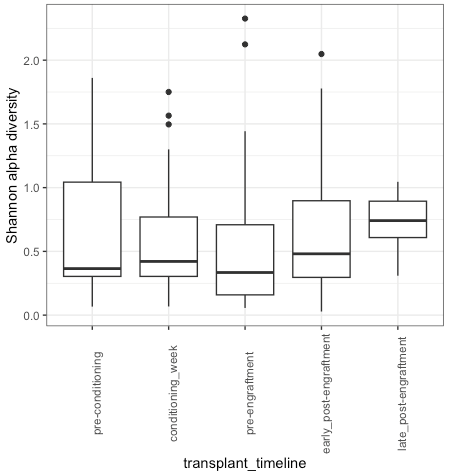


**Supplementary data 3: Significance tests for beta diversity (pairwise adonis)**

$parent_call

[1] "beta_dist_2[, 1:252] ~ transplant_timeline , strata = Null , permutations 9999"

$`pre-engraftment_vs_early_post-engraftment`

Df SumOfSqs R2 F Pr(>F)

transplant_timeline 1 0.1190 0.01572 2.46 0.11

Residual 154 7.4476 0.98428

Total 155 7.5666 1.00000

$`pre-engraftment_vs_conditioning_week`

Df SumOfSqs R2 F Pr(>F)

transplant_timeline 1 1.2100 0.15624 30.554 0.001 ***

Residual 165 6.5341 0.84376

Total 166 7.7441 1.00000

---

Signif. codes: 0 ‘***’ 0.001 ‘**’ 0.01 ‘*’ 0.05 ‘.’ 0.1 ‘ ’ 1

$`pre-engraftment_vs_pre-conditioning`

Df SumOfSqs R2 F Pr(>F)

transplant_timeline 1 0.0776 0.01515 1.5231 0.205

Residual 99 5.0437 0.98485

Total 100 5.1213 1.00000

$`pre-engraftment_vs_late_post-engraftment`

Df SumOfSqs R2 F Pr(>F)

transplant_timeline 1 0.0654 0.01405 1.3248 0.272

Residual 93 4.5921 0.98595

Total 94 4.6575 1.00000

$`early_post-engraftment_vs_conditioning_week`

Df SumOfSqs R2 F Pr(>F)

transplant_timeline 1 0.5794 0.10514 16.802 0.001 ***

Residual 143 4.9310 0.89486

Total 144 5.5104 1.00000

---

Signif. codes: 0 ‘***’ 0.001 ‘**’ 0.01 ‘*’ 0.05 ‘.’ 0.1 ‘ ’ 1

$`early_post-engraftment_vs_pre-conditioning`

Df SumOfSqs R2 F Pr(>F)

transplant_timeline 1 0.0111 0.0032 0.2474 0.698

Residual 77 3.4406 0.9968

Total 78 3.4516 1.0000

$`early_post-engraftment_vs_late_post-engraftment`

Df SumOfSqs R2 F Pr(>F)

transplant_timeline 1 0.10819 0.03493 2.57 0.107

Residual 71 2.98897 0.96507

Total 72 3.09716 1.00000

$`conditioning_week_vs_pre-conditioning`

Df SumOfSqs R2 F Pr(>F)

transplant_timeline 1 0.09031 0.0345 3.1448 0.069 .

Residual 88 2.52710 0.9655

Total 89 2.61741 1.0000

---

Signif. codes: 0 ‘***’ 0.001 ‘**’ 0.01 ‘*’ 0.05 ‘.’ 0.1 ‘ ’ 1

$`conditioning_week_vs_late_post-engraftment`

Df SumOfSqs R2 F Pr(>F)

transplant_timeline 1 0.3976 0.16077 15.709 0.001 ***

Residual 82 2.0755 0.83923

Total 83 2.4731 1.00000

---

Signif. codes: 0 ‘***’ 0.001 ‘**’ 0.01 ‘*’ 0.05 ‘.’ 0.1 ‘ ’ 1

$`pre-conditioning_vs_late_post-engraftment`

Df SumOfSqs R2 F Pr(>F)

transplant_timeline 1 0.11804 0.16789 3.2282 0.074 .

Residual 16 0.58502 0.83211

Total 17 0.70306 1.00000

---

Signif. codes: 0 ‘***’ 0.001 ‘**’ 0.01 ‘*’ 0.05 ‘.’ 0.1 ‘ ’ 1

attr(,"class")

[1] "pwadstrata" "list"

**Supplementary data 4: Taxa contributing to shifts in diversity relative to HSCT timeline**


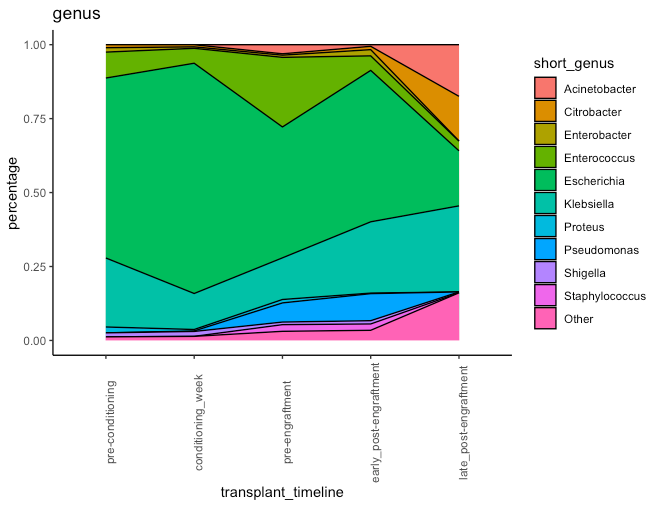


**Relative abundances of the 10 most abundant taxa detected in the enriched stool samples.** The relative abundance of *Escherichia* spiked during the conditioning week, accounting for 78.1% (403,582,054/516,955,793) of all OTUs assigned at that timepoint. At the pre-engraftment timepoint (n=586,882,141), the abundance of *Escherichia* dropped to 44.3% (260,182,871/586,882,141) of assigned OTUs and the relative abundance of *Enterococcus* peaked at 23.6% (n = 138,504,185) – representing the highest abundance of this genus throughout the transplant timeline. After neutrophil recovery in the early post-engraftment phase (n = 434,551,157), the abundance of *Enterococcus* declined to 4.93% relative abundance, but there was a notable increase in the abundance of *Klebsiella* (24.2%) and *Pseudomonas* (9.18%) compared to their abundances at the pre-transplant and pre-engraftment timepoints. At the late post-engraftment timepoint, *Escherichia* dropped to its lowest abundance (18.6%) compared to all previous timepoints. *Klebsiella* spp. dominate instead at the late post-engraftment timepoint, accounting for 29.1% of OTUs assigned at this timepoint (n = 36,390,898), followed by the *Acinetobacter* (17.5%) and *Citrobacter* (15.1%). Notably, organisms classified under the “Other” genera occupied the largest relative abundance at the late post-engraftment compared to previous timepoints, comprising 16.1% of all OTUs detected among samples collected at that timepoint.

**Supplementary data 5: Significance tests for AMR gene abundance and diversity relative to the transplant timeline**

| **Pairwise comparisons using t-tests with pooled SD** | | | | |
| --- | --- | --- | --- | --- |
| **P-value adjustment method: Bonferroni** | | | | |
|  |  |  |  |  |
| ***All AMR genes - abundance*** | | | | |
|  | *pre-conditioning* | *conditioning_week* | *pre-engraftment* | *early_post-engraftment* |
| *conditioning_week* | 1.00000 | - | - | - |
| *pre-engraftment* | 0.22524 | 0.00018 | - | - |
| *early_post-engraftment* | 1.00000 | 1.00000 | 0.00255 | - |
| *late_post-engraftment* | 1.00000 | 1.00000 | 0.11154 | 1.00000 |
|  |  |  |  |  |
| ***All AMR genes - diversity*** | | | | |
|  | *pre-conditioning* | *conditioning_week* | *pre-engraftment* | *early_post-engraftment* |
| *conditioning_week* | 1.00000 | - | - | - |
| *pre-engraftment* | 0.20278 | 0.00045 | - | - |
| *early_post-engraftment* | 1.00000 | 1.00000 | 0.00011 | - |
| *late_post-engraftment* | 1.00000 | 1.00000 | 0.41162 | 1.00000 |
|  |  |  |  |  |
| ***Non-efflux AMR genes - abundance*** | | | | |
|  | *pre-conditioning* | *conditioning_week* | *pre-engraftment* | *early_post-engraftment* |
| *conditioning_week* | 1.000 | - | - | - |
| *pre-engraftment* | 1.000 | 0.208 | - | - |
| *early_post-engraftment* | 1.000 | 1.000 | 0.003 | - |
| *late_post-engraftment* | 0.489 | 0.186 | 0.014 | 0.734 |
|  |  |  |  |  |
| ***Non-efflux AMR genes - diversity*** | | | | |
|  | *pre-conditioning* | *conditioning_week* | *pre-engraftment* | *early_post-engraftment* |
| *conditioning_week* | 1.00000 | - | - | - |
| *pre-engraftment* | 0.48991 | 0.01392 | - | - |
| *early_post-engraftment* | 1.00000 | 1.00000 | 0.00037 | - |
| *late_post-engraftment* | 1.00000 | 1.00000 | 0.30098 | 1.00000 |
|  |  |  |  |  |
| ***Non-efflux AMR genes - subset of participants with late post-engraftment samples*** | | | | |
|  | *pre-conditioning* | *conditioning_week* | *pre-engraftment* | *early_post-engraftment* |
| *conditioning_week* | 1.000 | - | - | - |
| *pre-engraftment* | 1.000 | 1.000 | - | - |
| *early_post-engraftment* | 1.000 | 1.000 | 0.801 | - |
| *late_post-engraftment* | 0.154 | 1.000 | 0.041 | 1.000 |
|  |  |  |  |  |
| ***ESBL/carbapenemase genes (blaOXA, blaTEM, blaNDM, bla,SHV, bla,CTX) - abundance*** | | | | |
|  | *pre-conditioning* | *conditioning_week* | *pre-engraftment* | *early_post-engraftment* |
| *conditioning_week* | 1.00000 | - | - | - |
| *pre-engraftment* | 1.00000 | 1.00000 | - | - |
| *early_post-engraftment* | 1.00000 | 0.00061 | 0.00888 | - |
| *late_post-engraftment* | 0.49984 | 0.06842 | 0.13554 | 1.00000 |

**Supplementary data 6: Output of multivariable logistic regression**

Call: glm(formula = infection ~ (aac + aad + aph + ant + shv + tem + ctx + sul + ndm + oxa + van) * transplant_timeline, family = binomial, data = hsct_wide)

Coefficients: Estimate Std. Error z value Pr(>|z|) (Intercept) -2.8040 2.0855 -1.345 0.1788

aac 0.3104 0.9405 0.330 0.7413

aad 1.0906 1.4328 0.761 0.4466

aph 0.1403 1.0145 0.138 0.8900

ant -0.5298 0.9347 -0.567 0.5709

shv -0.6599 0.9812 -0.673 0.5012

tem 1.5245 1.3291 1.147 0.2514

ctx -0.1683 0.9496 -0.177 0.8593

sul 1.6227 2.4249 0.669 0.5034

ndm -0.6785 0.8790 -0.772 0.4401

oxa -0.6814 1.1563 -0.589 0.5557

van 2.5166 1.5034 1.674 0.0941 .

transplant_timelinepre-engraftment 2.3634 2.2359 1.057 0.2905

transplant_timelineconditioning_week 1.7444 2.2954 0.760 0.4473

aac:transplant_timelinepre-engraftment -0.5882 1.1382 -0.517 0.6053

aac:transplant_timelineconditioning_week -0.3414 1.1810 -0.289 0.7725

aad:transplant_timelinepre-engraftment -1.3236 1.6012 -0.827 0.4084 aad:transplant_timelineconditioning_week -0.7737 1.5846 -0.488 0.6253

aph:transplant_timelinepre-engraftment 0.3824 1.2247 0.312 0.7549

aph:transplant_timelineconditioning_week -0.4905 1.2204 -0.402 0.6878

ant:transplant_timelinepre-engraftment 0.2041 1.1209 0.182 0.8555

ant:transplant_timelineconditioning_week 0.3381 1.1411 0.296 0.7670

shv:transplant_timelinepre-engraftment 0.2119 1.2001 0.177 0.8599

shv:transplant_timelineconditioning_week 2.0129 1.1683 1.723 0.0849 .

tem:transplant_timelinepre-engraftment -1.1323 1.5023 -0.754 0.4510

tem:transplant_timelineconditioning_week -1.5158 1.5302 -0.991 0.3219

ctx:transplant_timelinepre-engraftment 0.3948 1.1938 0.331 0.7409

ctx:transplant_timelineconditioning_week 0.8800 1.2606 0.698 0.4851

sul:transplant_timelinepre-engraftment -2.0288 2.5883 -0.784 0.4331

sul:transplant_timelineconditioning_week -2.4332 2.6001 -0.936 0.3494

ndm:transplant_timelinepre-engraftment 1.3219 1.1552 1.144 0.2525

ndm:transplant_timelineconditioning_week 2.3632 1.1649 2.029 0.0425 *

oxa:transplant_timelinepre-engraftment 0.8888 1.3411 0.663 0.5075

oxa:transplant_timelineconditioning_week -0.1853 1.4280 -0.130 0.8967

van:transplant_timelinepre-engraftment -2.0505 1.7399 -1.179 0.2386

van:transplant_timelineconditioning_week -0.2572 2.1708 -0.118 0.9057

---

Signif. codes: 0 ‘***’ 0.001 ‘**’ 0.01 ‘*’ 0.05 ‘.’ 0.1 ‘ ’ 1

(Dispersion parameter for binomial family taken to be 1)

Null deviance: 236.02 on 173 degrees of freedom

Residual deviance: 210.44 on 138 degrees of freedom

AIC: 282.44

Number of Fisher Scoring iterations: 4

**Supplementary data 7: Hi-C plasmid-associated AMR gene to host summary**

| **SampleID** | **gene_id** | **bin_id** | **origin** | **bin_taxonomy** | **mash_reference** | **origin_contig** | **origin_contig_length** | **gene_class** |
| --- | --- | --- | --- | --- | --- | --- | --- | --- |
| P02BT0031 | rmtB1 | bin_1 | plasmid | f__Enterobacteriaceae (UID5103) (bin_1) | Escherichia_coli_str._K_12_substr._MC4100.fna | NODE_1623_length_1929_cov_5.632337 | 1929 | AMINOGLYCOSIDE |
| P02BT0031 | aac(6')-Ib-cr5 | bin_1 | plasmid | f__Enterobacteriaceae (UID5103) (bin_1) | Escherichia_coli_str._K_12_substr._MC4100.fna | NODE_1685_length_1844_cov_41.626048 | 1844 | AMINOGLYCOSIDE/QUINOLONE |
| P02BT0031 | blaCMY-42 | bin_1 | plasmid | f__Enterobacteriaceae (UID5103) (bin_1) | Escherichia_coli_str._K_12_substr._MC4100.fna | NODE_1126_length_2803_cov_284.521470 | 2803 | BETA-LACTAM |
| P02BT0031 | blaCTX-M-15 | bin_1 | plasmid | f__Enterobacteriaceae (UID5103) (bin_1) | Escherichia_coli_str._K_12_substr._MC4100.fna | NODE_2116_length_1399_cov_575.293155 | 1399 | BETA-LACTAM |
| P02BT0031 | blaDHA-1 | bin_1 | plasmid | f__Enterobacteriaceae (UID5103) (bin_1) | Escherichia_coli_str._K_12_substr._MC4100.fna | NODE_352_length_7673_cov_88.611053 | 7673 | BETA-LACTAM |
| P02BT0031 | blaNDM-5 | bin_1 | plasmid | f__Enterobacteriaceae (UID5103) (bin_1) | Escherichia_coli_str._K_12_substr._MC4100.fna | NODE_536_length_5322_cov_133.444276 | 5322 | BETA-LACTAM |
| P02BT0031 | blaOXA-1 | bin_1 | plasmid | f__Enterobacteriaceae (UID5103) (bin_1) | Escherichia_coli_str._K_12_substr._MC4100.fna | NODE_1685_length_1844_cov_41.626048 | 1844 | BETA-LACTAM |
| P02BT0031 | blaOXA-232 | bin_1 | plasmid | f__Enterobacteriaceae (UID5103) (bin_1) | Escherichia_coli_str._K_12_substr._MC4100.fna | NODE_434_length_6203_cov_3332.689655 | 6203 | BETA-LACTAM |
| P02BT0031 | ble | bin_1 | plasmid | f__Enterobacteriaceae (UID5103) (bin_1) | Escherichia_coli_str._K_12_substr._MC4100.fna | NODE_536_length_5322_cov_133.444276 | 5322 | BLEOMYCIN |
| P02BT0031 | erm(B) | bin_1 | plasmid | f__Enterobacteriaceae (UID5103) (bin_1) | Escherichia_coli_str._K_12_substr._MC4100.fna | NODE_1336_length_2379_cov_16.043029 | 2379 | MACROLIDE |
| P02BT0031 | mph(A) | bin_1 | plasmid | f__Enterobacteriaceae (UID5103) (bin_1) | Escherichia_coli_str._K_12_substr._MC4100.fna | NODE_2433_length_1153_cov_312.689435 | 1153 | MACROLIDE |
| P02BT0031 | qacE | bin_1 | plasmid | f__Enterobacteriaceae (UID5103) (bin_1) | Escherichia_coli_str._K_12_substr._MC4100.fna | NODE_2471_length_1134_cov_340.784059 | 1134 | QUATERNARY AMMONIUM |
| P02BT0031 | qnrB4 | bin_1 | plasmid | f__Enterobacteriaceae (UID5103) (bin_1) | Escherichia_coli_str._K_12_substr._MC4100.fna | NODE_352_length_7673_cov_88.611053 | 7673 | QUINOLONE |
| P02BT0031 | qnrS1 | bin_1 | plasmid | f__Enterobacteriaceae (UID5103) (bin_1) | Escherichia_coli_str._K_12_substr._MC4100.fna | NODE_1339_length_2376_cov_52.355881 | 2376 | QUINOLONE |
| P02BT0031 | sul1 | bin_1 | plasmid | f__Enterobacteriaceae (UID5103) (bin_1) | Escherichia_coli_str._K_12_substr._MC4100.fna | NODE_2471_length_1134_cov_340.784059 | 1134 | SULFONAMIDE |
| P02BT0031 | sul3 | bin_1 | plasmid | f__Enterobacteriaceae (UID5103) (bin_1) | Escherichia_coli_str._K_12_substr._MC4100.fna | NODE_1053_length_2968_cov_95.952283 | 2968 | SULFONAMIDE |
| P02BT0031 | tet(A) | bin_1 | plasmid | f__Enterobacteriaceae (UID5103) (bin_1) | Escherichia_coli_str._K_12_substr._MC4100.fna | NODE_844_length_3565_cov_177.202564 | 3565 | TETRACYCLINE |
| P02BT0031 | tet(B) | bin_1 | plasmid | f__Enterobacteriaceae (UID5103) (bin_1) | Escherichia_coli_str._K_12_substr._MC4100.fna | NODE_927_length_3350_cov_69.841578 | 3350 | TETRACYCLINE |
| P02BT0031 | dfrA12 | bin_1 | plasmid | f__Enterobacteriaceae (UID5103) (bin_1) | Escherichia_coli_str._K_12_substr._MC4100.fna | NODE_2694_length_1023_cov_101.612603 | 1023 | TRIMETHOPRIM |
| P02BT0031 | dfrA17 | bin_1 | plasmid | f__Enterobacteriaceae (UID5103) (bin_1) | Escherichia_coli_str._K_12_substr._MC4100.fna | NODE_2717_length_1003_cov_215.528481 | 1003 | TRIMETHOPRIM |
| P05AT0063 | aac(6')-I | bin_1 | plasmid | o__Lactobacillales (UID544) (bin_1) | Enterococcus_faecium.fna | NODE_11_length_65008_cov_470.923098 | 65008 | AMINOGLYCOSIDE |
| P05AT0063 | ant(6)-Ia | bin_2 | plasmid | root (UID1) (bin_2) | Enterococcus_faecium_EnGen0180.fna | NODE_764_length_1339_cov_128.181464 | 1339 | AMINOGLYCOSIDE |
| P05AT0063 | aph(3')-IIIa | bin_2 | plasmid | root (UID1) (bin_2) | Enterococcus_faecium_EnGen0180.fna | NODE_589_length_1658_cov_135.447910 | 1658 | AMINOGLYCOSIDE |
| P05AT0063 | vanA | bin_1 | plasmid | o__Lactobacillales (UID544) (bin_1) | Enterococcus_faecium.fna | NODE_27_length_36046_cov_676.891528 | 36046 | GLYCOPEPTIDE |
| P05AT0063 | vanH-A | bin_1 | plasmid | o__Lactobacillales (UID544) (bin_1) | Enterococcus_faecium.fna | NODE_27_length_36046_cov_676.891528 | 36046 | GLYCOPEPTIDE |
| P05AT0063 | vanR-A | bin_1 | plasmid | o__Lactobacillales (UID544) (bin_1) | Enterococcus_faecium.fna | NODE_27_length_36046_cov_676.891528 | 36046 | GLYCOPEPTIDE |
| P05AT0063 | vanS-A | bin_1 | plasmid | o__Lactobacillales (UID544) (bin_1) | Enterococcus_faecium.fna | NODE_27_length_36046_cov_676.891528 | 36046 | GLYCOPEPTIDE |
| P05AT0063 | vanX-A | bin_1 | plasmid | o__Lactobacillales (UID544) (bin_1) | Enterococcus_faecium.fna | NODE_27_length_36046_cov_676.891528 | 36046 | GLYCOPEPTIDE |
| P05AT0063 | vanY-A | bin_1 | plasmid | o__Lactobacillales (UID544) (bin_1) | Enterococcus_faecium.fna | NODE_27_length_36046_cov_676.891528 | 36046 | GLYCOPEPTIDE |
| P05AT0063 | vanZ-A | bin_1 | plasmid | o__Lactobacillales (UID544) (bin_1) | Enterococcus_faecium.fna | NODE_27_length_36046_cov_676.891528 | 36046 | GLYCOPEPTIDE |
| P05AT0063 | eat(A) | bin_1 | plasmid | o__Lactobacillales (UID544) (bin_1) | Enterococcus_faecium.fna | NODE_23_length_44885_cov_450.839795 | 44885 | PLEUROMUTILIN |
| P05AT0063 | tet(M) | bin_2 | plasmid | root (UID1) (bin_2) | Enterococcus_faecium_EnGen0180.fna | NODE_83_length_11630_cov_38.830497 | 11630 | TETRACYCLINE |
| P05AT0063 | tet(S) | bin_1 | plasmid | o__Lactobacillales (UID544) (bin_1) | Enterococcus_faecium.fna | NODE_78_length_12346_cov_1270.410056 | 12346 | TETRACYCLINE |
| P10AT0324 | aadA1 | bin_1 | plasmid | k__Bacteria (UID203) (bin_1) | Klebsiella_pneumoniae_UCI_60.fna | NODE_158_length_7767_cov_101.315353 | 7767 | AMINOGLYCOSIDE |
| P10AT0324 | aadA5 | bin_2 | plasmid | f__Enterobacteriaceae (UID5103) (bin_2) | Escherichia_coli_LAU_EC8.fna | NODE_338_length_1610_cov_276.416720 | 1610 | AMINOGLYCOSIDE |
| P10AT0324 | aph(3')-Ia | bin_1 | plasmid | k__Bacteria (UID203) (bin_1) | Klebsiella_pneumoniae_UCI_60.fna | NODE_381_length_1145_cov_83.492661 | 1145 | AMINOGLYCOSIDE |
| P10AT0324 | aac(6')-Ib-cr5 | bin_2 | plasmid | f__Enterobacteriaceae (UID5103) (bin_2) | Escherichia_coli_LAU_EC8.fna | NODE_292_length_2293_cov_212.168007 | 2293 | AMINOGLYCOSIDE/QUINOLONE |
| P10AT0324 | blaDHA-1 | bin_1 | plasmid | k__Bacteria (UID203) (bin_1) | Klebsiella_pneumoniae_UCI_60.fna | NODE_161_length_7674_cov_45.660454 | 7674 | BETA-LACTAM |
| P10AT0324 | blaNDM-5 | bin_3 | plasmid | root (UID1) (bin_3) | Escherichia_coli_UMEA_3314_1.fna | NODE_190_length_5704_cov_89.238980 | 5704 | BETA-LACTAM |
| P10AT0324 | blaOXA-1 | bin_2 | plasmid | f__Enterobacteriaceae (UID5103) (bin_2) | Escherichia_coli_LAU_EC8.fna | NODE_292_length_2293_cov_212.168007 | 2293 | BETA-LACTAM |
| P10AT0324 | ble | bin_3 | plasmid | root (UID1) (bin_3) | Escherichia_coli_UMEA_3314_1.fna | NODE_190_length_5704_cov_89.238980 | 5704 | BLEOMYCIN |
| P10AT0324 | erm(B) | bin_2 | plasmid | f__Enterobacteriaceae (UID5103) (bin_2) | Escherichia_coli_LAU_EC8.fna | NODE_224_length_4175_cov_338.273786 | 4175 | MACROLIDE |
| P10AT0324 | mph(A) | bin_2 | plasmid | f__Enterobacteriaceae (UID5103) (bin_2) | Escherichia_coli_LAU_EC8.fna | NODE_225_length_4174_cov_723.752853 | 4174 | MACROLIDE |
| P10AT0324 | catA1 | bin_2 | plasmid | f__Enterobacteriaceae (UID5103) (bin_2) | Escherichia_coli_LAU_EC8.fna | NODE_205_length_5140_cov_289.069027 | 5140 | PHENICOL |
| P10AT0324 | catB3 | bin_2 | plasmid | f__Enterobacteriaceae (UID5103) (bin_2) | Escherichia_coli_LAU_EC8.fna | NODE_292_length_2293_cov_212.168007 | 2293 | PHENICOL |
| P10AT0324 | cmlA1 | bin_1 | plasmid | k__Bacteria (UID203) (bin_1) | Klebsiella_pneumoniae_UCI_60.fna | NODE_158_length_7767_cov_101.315353 | 7767 | PHENICOL |
| P10AT0324 | qacEdelta1 | bin_2 | plasmid | f__Enterobacteriaceae (UID5103) (bin_2) | Escherichia_coli_LAU_EC8.fna | NODE_361_length_1316_cov_745.006344 | 1316 | QUATERNARY AMMONIUM |
| P10AT0324 | qacL | bin_1 | plasmid | k__Bacteria (UID203) (bin_1) | Klebsiella_pneumoniae_UCI_60.fna | NODE_158_length_7767_cov_101.315353 | 7767 | QUATERNARY AMMONIUM |
| P10AT0324 | qnrB4 | bin_1 | plasmid | k__Bacteria (UID203) (bin_1) | Klebsiella_pneumoniae_UCI_60.fna | NODE_161_length_7674_cov_45.660454 | 7674 | QUINOLONE |
| P10AT0324 | qnrS13 | bin_1 | plasmid | k__Bacteria (UID203) (bin_1) | Klebsiella_pneumoniae_UCI_60.fna | NODE_244_length_3518_cov_476.626336 | 3518 | QUINOLONE |
| P10AT0324 | sul1 | bin_2 | plasmid | f__Enterobacteriaceae (UID5103) (bin_2) | Escherichia_coli_LAU_EC8.fna | NODE_361_length_1316_cov_745.006344 | 1316 | SULFONAMIDE |
| P10AT0324 | sul3 | bin_1 | plasmid | k__Bacteria (UID203) (bin_1) | Klebsiella_pneumoniae_UCI_60.fna | NODE_158_length_7767_cov_101.315353 | 7767 | SULFONAMIDE |
| P10AT0324 | tet(A) | bin_1 | plasmid | k__Bacteria (UID203) (bin_1) | Klebsiella_pneumoniae_UCI_60.fna | NODE_216_length_4339_cov_146.093137 | 4339 | TETRACYCLINE |
| P10AT0324 | tet(B) | bin_2 | plasmid | f__Enterobacteriaceae (UID5103) (bin_2) | Escherichia_coli_LAU_EC8.fna | NODE_226_length_4164_cov_258.233147 | 4164 | TETRACYCLINE |
| P10AT0324 | dfrA12 | bin_3 | plasmid | root (UID1) (bin_3) | Escherichia_coli_UMEA_3314_1.fna | NODE_395_length_1023_cov_90.989669 | 1023 | TRIMETHOPRIM |
| P10AT0324 | dfrA17 | bin_2 | plasmid | f__Enterobacteriaceae (UID5103) (bin_2) | Escherichia_coli_LAU_EC8.fna | NODE_338_length_1610_cov_276.416720 | 1610 | TRIMETHOPRIM |
| P24BT0081 | blaDHA | bin_2 | plasmid | root (UID1) (bin_2) | Escherichia_coli_BIDMC_49a.fna | NODE_191_length_2405_cov_6.549787 | 2405 | BETA-LACTAM |
| P24BT0081 | erm(B) | bin_2 | plasmid | root (UID1) (bin_2) | Escherichia_coli_BIDMC_49a.fna | NODE_102_length_4174_cov_7.510318 | 4174 | MACROLIDE |
| P24BT0081 | qnrB4 | bin_2 | plasmid | root (UID1) (bin_2) | Escherichia_coli_BIDMC_49a.fna | NODE_71_length_5376_cov_6.877843 | 5376 | QUINOLONE |
| P24BT0081 | dfrA17 | bin_2 | plasmid | root (UID1) (bin_2) | Escherichia_coli_BIDMC_49a.fna | NODE_398_length_1060_cov_5.542289 | 1060 | TRIMETHOPRIM |
| P31AT0103 | aac(3)-IIe | bin_1 | plasmid | k__Bacteria (UID203) (bin_1) | Klebsiella_pneumoniae.fna | NODE_371_length_2704_cov_66.447716 | 2704 | AMINOGLYCOSIDE |
| P31AT0103 | aadA2 | bin_1 | plasmid | k__Bacteria (UID203) (bin_1) | Klebsiella_pneumoniae.fna | NODE_187_length_9478_cov_1258.296084 | 9478 | AMINOGLYCOSIDE |
| P31AT0103 | aadA5 | bin_1 | plasmid | k__Bacteria (UID203) (bin_1) | Klebsiella_pneumoniae.fna | NODE_586_length_1608_cov_69.401803 | 1608 | AMINOGLYCOSIDE |
| P31AT0103 | aph(3'')-Ib | bin_1 | plasmid | k__Bacteria (UID203) (bin_1) | Klebsiella_pneumoniae.fna | NODE_317_length_3486_cov_44.015447 | 3486 | AMINOGLYCOSIDE |
| P31AT0103 | aph(6)-Id | bin_1 | plasmid | k__Bacteria (UID203) (bin_1) | Klebsiella_pneumoniae.fna | NODE_317_length_3486_cov_44.015447 | 3486 | AMINOGLYCOSIDE |
| P31AT0103 | rmtB1 | bin_1 | plasmid | k__Bacteria (UID203) (bin_1) | Klebsiella_pneumoniae.fna | NODE_460_length_2066_cov_240.039284 | 2066 | AMINOGLYCOSIDE |
| P31AT0103 | aac(6')-Ib-cr5 | bin_1 | plasmid | k__Bacteria (UID203) (bin_1) | Klebsiella_pneumoniae.fna | NODE_421_length_2270_cov_74.034312 | 2270 | AMINOGLYCOSIDE/QUINOLONE |
| P31AT0103 | blaCMY-145 | bin_2 | plasmid | f__Enterobacteriaceae (UID5103) (bin_2) | Escherichia_coli.fna | NODE_112_length_23139_cov_982.498137 | 23139 | BETA-LACTAM |
| P31AT0103 | blaCTX-M-15 | bin_1 | plasmid | k__Bacteria (UID203) (bin_1) | Klebsiella_pneumoniae.fna | NODE_310_length_3616_cov_113.024431 | 3616 | BETA-LACTAM |
| P31AT0103 | blaNDM-5 | bin_1 | plasmid | k__Bacteria (UID203) (bin_1) | Klebsiella_pneumoniae.fna | NODE_187_length_9478_cov_1258.296084 | 9478 | BETA-LACTAM |
| P31AT0103 | blaOXA-1 | bin_1 | plasmid | k__Bacteria (UID203) (bin_1) | Klebsiella_pneumoniae.fna | NODE_421_length_2270_cov_74.034312 | 2270 | BETA-LACTAM |
| P31AT0103 | blaOXA-232 | bin_1 | plasmid | k__Bacteria (UID203) (bin_1) | Klebsiella_pneumoniae.fna | NODE_526_length_1759_cov_2526.975352 | 1759 | BETA-LACTAM |
| P31AT0103 | blaTEM | bin_1 | plasmid | k__Bacteria (UID203) (bin_1) | Klebsiella_pneumoniae.fna | NODE_632_length_1502_cov_274.111956 | 1502 | BETA-LACTAM |
| P31AT0103 | ble | bin_1 | plasmid | k__Bacteria (UID203) (bin_1) | Klebsiella_pneumoniae.fna | NODE_187_length_9478_cov_1258.296084 | 9478 | BLEOMYCIN |
| P31AT0103 | erm(B) | bin_1 | plasmid | k__Bacteria (UID203) (bin_1) | Klebsiella_pneumoniae.fna | NODE_285_length_4173_cov_327.092035 | 4173 | MACROLIDE |
| P31AT0103 | mph(A) | bin_1 | plasmid | k__Bacteria (UID203) (bin_1) | Klebsiella_pneumoniae.fna | NODE_286_length_4168_cov_926.066132 | 4168 | MACROLIDE |
| P31AT0103 | catA1 | bin_1 | plasmid | k__Bacteria (UID203) (bin_1) | Klebsiella_pneumoniae.fna | NODE_239_length_6284_cov_134.877669 | 6284 | PHENICOL |
| P31AT0103 | catB3 | bin_1 | plasmid | k__Bacteria (UID203) (bin_1) | Klebsiella_pneumoniae.fna | NODE_421_length_2270_cov_74.034312 | 2270 | PHENICOL |
| P31AT0103 | qacEdelta1 | bin_1 | plasmid | k__Bacteria (UID203) (bin_1) | Klebsiella_pneumoniae.fna | NODE_187_length_9478_cov_1258.296084 | 9478 | QUATERNARY AMMONIUM |
| P31AT0103 | qnrS1 | bin_2 | plasmid | f__Enterobacteriaceae (UID5103) (bin_2) | Escherichia_coli.fna | NODE_347_length_3013_cov_455.911089 | 3013 | QUINOLONE |
| P31AT0103 | qnrS1 | bin_1 | plasmid | k__Bacteria (UID203) (bin_1) | Klebsiella_pneumoniae.fna | NODE_347_length_3013_cov_455.911089 | 3013 | QUINOLONE |
| P31AT0103 | sul1 | bin_1 | plasmid | k__Bacteria (UID203) (bin_1) | Klebsiella_pneumoniae.fna | NODE_187_length_9478_cov_1258.296084 | 9478 | SULFONAMIDE |
| P31AT0103 | sul2 | bin_1 | plasmid | k__Bacteria (UID203) (bin_1) | Klebsiella_pneumoniae.fna | NODE_317_length_3486_cov_44.015447 | 3486 | SULFONAMIDE |
| P31AT0103 | tet(A) | bin_2 | plasmid | f__Enterobacteriaceae (UID5103) (bin_2) | Escherichia_coli.fna | NODE_288_length_4030_cov_732.532327 | 4030 | TETRACYCLINE |
| P31AT0103 | tet(B) | bin_1 | plasmid | k__Bacteria (UID203) (bin_1) | Klebsiella_pneumoniae.fna | NODE_406_length_2421_cov_178.202451 | 2421 | TETRACYCLINE |
| P31AT0103 | dfrA12 | bin_1 | plasmid | k__Bacteria (UID203) (bin_1) | Klebsiella_pneumoniae.fna | NODE_187_length_9478_cov_1258.296084 | 9478 | TRIMETHOPRIM |
| P31AT0103 | dfrA17 | bin_1 | plasmid | k__Bacteria (UID203) (bin_1) | Klebsiella_pneumoniae.fna | NODE_586_length_1608_cov_69.401803 | 1608 | TRIMETHOPRIM |
| P44AT0042 | blaTEM-1 | bin_1 | plasmid | f__Enterobacteriaceae (UID5103) (bin_1) | Klebsiella_pneumoniae.fna | NODE_21_length_36103_cov_607.786951 | 36103 | BETA-LACTAM |
| P44AT0042 | tet(D) | bin_1 | plasmid | f__Enterobacteriaceae (UID5103) (bin_1) | Klebsiella_pneumoniae.fna | NODE_21_length_36103_cov_607.786951 | 36103 | TETRACYCLINE |
| P53AT0274 | aadA2 | bin_1 | plasmid | f__Enterobacteriaceae (UID5103) (bin_1) | Klebsiella_pneumoniae.fna | NODE_172_length_1811_cov_326.653189 | 1811 | AMINOGLYCOSIDE |
| P53AT0274 | aadA5 | bin_2 | plasmid | f__Enterobacteriaceae (UID5103) (bin_2) | Escherichia_coli_908555.fna | NODE_178_length_1610_cov_621.870740 | 1610 | AMINOGLYCOSIDE |
| P53AT0274 | rmtB1 | bin_1 | plasmid | f__Enterobacteriaceae (UID5103) (bin_1) | Klebsiella_pneumoniae.fna | NODE_145_length_4057_cov_310.020490 | 4057 | AMINOGLYCOSIDE |
| P53AT0274 | aac(6')-Ib-cr5 | bin_2 | plasmid | f__Enterobacteriaceae (UID5103) (bin_2) | Escherichia_coli_908555.fna | NODE_161_length_2816_cov_753.087287 | 2816 | AMINOGLYCOSIDE/QUINOLONE |
| P53AT0274 | aac(6')-Ib-cr5 | bin_1 | plasmid | f__Enterobacteriaceae (UID5103) (bin_1) | Klebsiella_pneumoniae.fna | NODE_150_length_3317_cov_407.725628 | 3317 | AMINOGLYCOSIDE/QUINOLONE |
| P53AT0274 | blaCMY-42 | bin_2 | plasmid | f__Enterobacteriaceae (UID5103) (bin_2) | Escherichia_coli_908555.fna | NODE_87_length_28681_cov_361.184518 | 28681 | BETA-LACTAM |
| P53AT0274 | blaCTX-M-15 | bin_1 | plasmid | f__Enterobacteriaceae (UID5103) (bin_1) | Klebsiella_pneumoniae.fna | NODE_174_length_1728_cov_353.098027 | 1728 | BETA-LACTAM |
| P53AT0274 | blaNDM-1 | bin_1 | plasmid | f__Enterobacteriaceae (UID5103) (bin_1) | Klebsiella_pneumoniae.fna | NODE_176_length_1637_cov_634.087863 | 1637 | BETA-LACTAM |
| P53AT0274 | blaOXA-1 | bin_2 | plasmid | f__Enterobacteriaceae (UID5103) (bin_2) | Escherichia_coli_908555.fna | NODE_161_length_2816_cov_753.087287 | 2816 | BETA-LACTAM |
| P53AT0274 | blaOXA-232 | bin_1 | plasmid | f__Enterobacteriaceae (UID5103) (bin_1) | Klebsiella_pneumoniae.fna | NODE_162_length_2812_cov_4502.956837 | 2812 | BETA-LACTAM |
| P53AT0274 | blaTEM-1 | bin_1 | plasmid | f__Enterobacteriaceae (UID5103) (bin_1) | Klebsiella_pneumoniae.fna | NODE_145_length_4057_cov_310.020490 | 4057 | BETA-LACTAM |
| P53AT0274 | ble | bin_1 | plasmid | f__Enterobacteriaceae (UID5103) (bin_1) | Klebsiella_pneumoniae.fna | NODE_176_length_1637_cov_634.087863 | 1637 | BLEOMYCIN |
| P53AT0274 | erm(B) | bin_2 | plasmid | f__Enterobacteriaceae (UID5103) (bin_2) | Escherichia_coli_908555.fna | NODE_144_length_4174_cov_1147.307356 | 4174 | MACROLIDE |
| P53AT0274 | mph(A) | bin_2 | plasmid | f__Enterobacteriaceae (UID5103) (bin_2) | Escherichia_coli_908555.fna | NODE_149_length_3344_cov_768.149894 | 3344 | MACROLIDE |
| P53AT0274 | catB | bin_1 | plasmid | f__Enterobacteriaceae (UID5103) (bin_1) | Klebsiella_pneumoniae.fna | NODE_150_length_3317_cov_407.725628 | 3317 | PHENICOL |
| P53AT0274 | catB3 | bin_2 | plasmid | f__Enterobacteriaceae (UID5103) (bin_2) | Escherichia_coli_908555.fna | NODE_161_length_2816_cov_753.087287 | 2816 | PHENICOL |
| P53AT0274 | qacEdelta1 | bin_2 | plasmid | f__Enterobacteriaceae (UID5103) (bin_2) | Escherichia_coli_908555.fna | NODE_198_length_1043_cov_907.814777 | 1043 | QUATERNARY AMMONIUM |
| P53AT0274 | qnrB1 | bin_1 | plasmid | f__Enterobacteriaceae (UID5103) (bin_1) | Klebsiella_pneumoniae.fna | NODE_173_length_1759_cov_392.288146 | 1759 | QUINOLONE |
| P53AT0274 | qnrS1 | bin_2 | plasmid | f__Enterobacteriaceae (UID5103) (bin_2) | Escherichia_coli_908555.fna | NODE_135_length_5920_cov_392.500085 | 5920 | QUINOLONE |
| P53AT0274 | arr | bin_2 | plasmid | f__Enterobacteriaceae (UID5103) (bin_2) | Escherichia_coli_908555.fna | NODE_161_length_2816_cov_753.087287 | 2816 | RIFAMYCIN |
| P53AT0274 | sul1 | bin_2 | plasmid | f__Enterobacteriaceae (UID5103) (bin_2) | Escherichia_coli_908555.fna | NODE_198_length_1043_cov_907.814777 | 1043 | SULFONAMIDE |
| P53AT0274 | tet(B) | bin_2 | plasmid | f__Enterobacteriaceae (UID5103) (bin_2) | Escherichia_coli_908555.fna | NODE_155_length_2975_cov_347.798288 | 2975 | TETRACYCLINE |
| P53AT0274 | dfrA12 | bin_1 | plasmid | f__Enterobacteriaceae (UID5103) (bin_1) | Klebsiella_pneumoniae.fna | NODE_172_length_1811_cov_326.653189 | 1811 | TRIMETHOPRIM |
| P53AT0274 | dfrA17 | bin_2 | plasmid | f__Enterobacteriaceae (UID5103) (bin_2) | Escherichia_coli_908555.fna | NODE_178_length_1610_cov_621.870740 | 1610 | TRIMETHOPRIM |
| P53AT0536 | aadA2 | bin_1 | plasmid | f__Enterobacteriaceae (UID5103) (bin_1) | Klebsiella_pneumoniae.fna | NODE_64_length_6342_cov_11178.931446 | 6342 | AMINOGLYCOSIDE |
| P53AT0536 | blaCMY | bin_1 | plasmid | f__Enterobacteriaceae (UID5103) (bin_1) | Klebsiella_pneumoniae.fna | NODE_53_length_24847_cov_523.413117 | 24847 | BETA-LACTAM |
| P53AT0536 | blaNDM-5 | bin_1 | plasmid | f__Enterobacteriaceae (UID5103) (bin_1) | Klebsiella_pneumoniae.fna | NODE_70_length_3552_cov_2757.059480 | 3552 | BETA-LACTAM |
| P53AT0536 | ble | bin_1 | plasmid | f__Enterobacteriaceae (UID5103) (bin_1) | Klebsiella_pneumoniae.fna | NODE_70_length_3552_cov_2757.059480 | 3552 | BLEOMYCIN |
| P53AT0536 | mph(A) | bin_1 | plasmid | f__Enterobacteriaceae (UID5103) (bin_1) | Klebsiella_pneumoniae.fna | NODE_68_length_4222_cov_871.765059 | 4222 | MACROLIDE |
| P53AT0536 | qacEdelta1 | bin_1 | plasmid | f__Enterobacteriaceae (UID5103) (bin_1) | Klebsiella_pneumoniae.fna | NODE_64_length_6342_cov_11178.931446 | 6342 | QUATERNARY AMMONIUM |
| P53AT0536 | sul1 | bin_1 | plasmid | f__Enterobacteriaceae (UID5103) (bin_1) | Klebsiella_pneumoniae.fna | NODE_64_length_6342_cov_11178.931446 | 6342 | SULFONAMIDE |
| P53AT0536 | tet(A) | bin_1 | plasmid | f__Enterobacteriaceae (UID5103) (bin_1) | Klebsiella_pneumoniae.fna | NODE_63_length_10107_cov_12672.042579 | 10107 | TETRACYCLINE |
| P53AT0536 | dfrA12 | bin_1 | plasmid | f__Enterobacteriaceae (UID5103) (bin_1) | Klebsiella_pneumoniae.fna | NODE_64_length_6342_cov_11178.931446 | 6342 | TRIMETHOPRIM |
| P61AT0042 | aadA5 | bin_1 | plasmid | f__Enterobacteriaceae (UID5103) (bin_1) | Escherichia_coli_CUMT8.fna | NODE_414_length_1658_cov_418.863381 | 1658 | AMINOGLYCOSIDE |
| P61AT0042 | mef(A) | bin_2 | plasmid | o__Lactobacillales (UID544) (bin_2) | Enterococcus_hirae_ATCC_9790.fna | NODE_77_length_22114_cov_18.410309 | 22114 | MACROLIDE |
| P61AT0042 | sul2 | bin_1 | plasmid | f__Enterobacteriaceae (UID5103) (bin_1) | Escherichia_coli_CUMT8.fna | NODE_235_length_6153_cov_374.449820 | 6153 | SULFONAMIDE |
| P61AT0042 | tet(A) | bin_1 | plasmid | f__Enterobacteriaceae (UID5103) (bin_1) | Escherichia_coli_CUMT8.fna | NODE_252_length_5490_cov_1345.650966 | 5490 | TETRACYCLINE |
| P61AT0042 | tet(L) | bin_2 | plasmid | o__Lactobacillales (UID544) (bin_2) | Enterococcus_hirae_ATCC_9790.fna | NODE_77_length_22114_cov_18.410309 | 22114 | TETRACYCLINE |
| P61AT0042 | tet(M) | bin_2 | plasmid | o__Lactobacillales (UID544) (bin_2) | Enterococcus_hirae_ATCC_9790.fna | NODE_77_length_22114_cov_18.410309 | 22114 | TETRACYCLINE |
| P61AT0042 | dfrA17 | bin_1 | plasmid | f__Enterobacteriaceae (UID5103) (bin_1) | Escherichia_coli_CUMT8.fna | NODE_414_length_1658_cov_418.863381 | 1658 | TRIMETHOPRIM |
| P75BT0061 | aac(3)-IIe | bin_1 | plasmid | f__Enterobacteriaceae (UID5103) (bin_1) | Escherichia_coli_UCI_53.fna | NODE_121_length_2708_cov_545.420279 | 2708 | AMINOGLYCOSIDE |
| P75BT0061 | aadA2 | bin_1 | plasmid | f__Enterobacteriaceae (UID5103) (bin_1) | Escherichia_coli_UCI_53.fna | NODE_75_length_9665_cov_18.711342 | 9665 | AMINOGLYCOSIDE |
| P75BT0061 | aac(6')-Ib-cr5 | bin_1 | plasmid | f__Enterobacteriaceae (UID5103) (bin_1) | Escherichia_coli_UCI_53.fna | NODE_127_length_2294_cov_573.087986 | 2294 | AMINOGLYCOSIDE/QUINOLONE |
| P75BT0061 | blaCMY-145 | bin_1 | plasmid | f__Enterobacteriaceae (UID5103) (bin_1) | Escherichia_coli_UCI_53.fna | NODE_63_length_16061_cov_8.059228 | 16061 | BETA-LACTAM |
| P75BT0061 | blaCTX-M-15 | bin_1 | plasmid | f__Enterobacteriaceae (UID5103) (bin_1) | Escherichia_coli_UCI_53.fna | NODE_100_length_4872_cov_594.078680 | 4872 | BETA-LACTAM |
| P75BT0061 | blaNDM-5 | bin_1 | plasmid | f__Enterobacteriaceae (UID5103) (bin_1) | Escherichia_coli_UCI_53.fna | NODE_75_length_9665_cov_18.711342 | 9665 | BETA-LACTAM |
| P75BT0061 | blaOXA-1 | bin_1 | plasmid | f__Enterobacteriaceae (UID5103) (bin_1) | Escherichia_coli_UCI_53.fna | NODE_127_length_2294_cov_573.087986 | 2294 | BETA-LACTAM |
| P75BT0061 | ble | bin_1 | plasmid | f__Enterobacteriaceae (UID5103) (bin_1) | Escherichia_coli_UCI_53.fna | NODE_75_length_9665_cov_18.711342 | 9665 | BLEOMYCIN |
| P75BT0061 | mph(A) | bin_1 | plasmid | f__Enterobacteriaceae (UID5103) (bin_1) | Escherichia_coli_UCI_53.fna | NODE_105_length_4050_cov_547.385232 | 4050 | MACROLIDE |
| P75BT0061 | catB3 | bin_1 | plasmid | f__Enterobacteriaceae (UID5103) (bin_1) | Escherichia_coli_UCI_53.fna | NODE_127_length_2294_cov_573.087986 | 2294 | PHENICOL |
| P75BT0061 | qacEdelta1 | bin_1 | plasmid | f__Enterobacteriaceae (UID5103) (bin_1) | Escherichia_coli_UCI_53.fna | NODE_75_length_9665_cov_18.711342 | 9665 | QUATERNARY AMMONIUM |
| P75BT0061 | sul1 | bin_1 | plasmid | f__Enterobacteriaceae (UID5103) (bin_1) | Escherichia_coli_UCI_53.fna | NODE_75_length_9665_cov_18.711342 | 9665 | SULFONAMIDE |
| P75BT0061 | tet(A) | bin_1 | plasmid | f__Enterobacteriaceae (UID5103) (bin_1) | Escherichia_coli_UCI_53.fna | NODE_61_length_16658_cov_616.753779 | 16658 | TETRACYCLINE |
| P75BT0061 | dfrA12 | bin_1 | plasmid | f__Enterobacteriaceae (UID5103) (bin_1) | Escherichia_coli_UCI_53.fna | NODE_75_length_9665_cov_18.711342 | 9665 | TRIMETHOPRIM |
| P81BT0071 | aac(3)-IIe | bin_2 | plasmid | root (UID1) (bin_2) | Escherichia_coli_LR09.fna | NODE_257_length_2707_cov_22.564857 | 2707 | AMINOGLYCOSIDE |
| P81BT0071 | aadA2 | bin_1 | plasmid | f__Enterobacteriaceae (UID5103) (bin_1) | Escherichia_coli.fna | NODE_103_length_9781_cov_690.322640 | 9781 | AMINOGLYCOSIDE |
| P81BT0071 | aadA5 | bin_2 | plasmid | root (UID1) (bin_2) | Escherichia_coli_LR09.fna | NODE_361_length_1608_cov_36.948487 | 1608 | AMINOGLYCOSIDE |
| P81BT0071 | aac(6')-Ib-cr5 | bin_1 | plasmid | f__Enterobacteriaceae (UID5103) (bin_1) | Escherichia_coli.fna | NODE_294_length_2292_cov_620.851587 | 2292 | AMINOGLYCOSIDE/QUINOLONE |
| P81BT0071 | blaCMY-42 | bin_2 | plasmid | root (UID1) (bin_2) | Escherichia_coli_LR09.fna | NODE_270_length_2540_cov_18.444668 | 2540 | BETA-LACTAM |
| P81BT0071 | blaCTX-M-15 | bin_1 | plasmid | f__Enterobacteriaceae (UID5103) (bin_1) | Escherichia_coli.fna | NODE_191_length_4164_cov_651.528839 | 4164 | BETA-LACTAM |
| P81BT0071 | blaNDM-5 | bin_1 | plasmid | f__Enterobacteriaceae (UID5103) (bin_1) | Escherichia_coli.fna | NODE_103_length_9781_cov_690.322640 | 9781 | BETA-LACTAM |
| P81BT0071 | blaOXA-1 | bin_1 | plasmid | f__Enterobacteriaceae (UID5103) (bin_1) | Escherichia_coli.fna | NODE_294_length_2292_cov_620.851587 | 2292 | BETA-LACTAM |
| P81BT0071 | blaTEM-1 | bin_2 | plasmid | root (UID1) (bin_2) | Escherichia_coli_LR09.fna | NODE_216_length_3446_cov_20.166028 | 3446 | BETA-LACTAM |
| P81BT0071 | ble | bin_1 | plasmid | f__Enterobacteriaceae (UID5103) (bin_1) | Escherichia_coli.fna | NODE_103_length_9781_cov_690.322640 | 9781 | BLEOMYCIN |
| P81BT0071 | erm(B) | bin_1 | plasmid | f__Enterobacteriaceae (UID5103) (bin_1) | Escherichia_coli.fna | NODE_190_length_4173_cov_628.492958 | 4173 | MACROLIDE |
| P81BT0071 | mph(A) | bin_1 | plasmid | f__Enterobacteriaceae (UID5103) (bin_1) | Escherichia_coli.fna | NODE_192_length_4146_cov_1275.933757 | 4146 | MACROLIDE |
| P81BT0071 | catA1 | bin_2 | plasmid | root (UID1) (bin_2) | Escherichia_coli_LR09.fna | NODE_167_length_5141_cov_15.180495 | 5141 | PHENICOL |
| P81BT0071 | catB3 | bin_1 | plasmid | f__Enterobacteriaceae (UID5103) (bin_1) | Escherichia_coli.fna | NODE_294_length_2292_cov_620.851587 | 2292 | PHENICOL |
| P81BT0071 | qacEdelta1 | bin_1 | plasmid | f__Enterobacteriaceae (UID5103) (bin_1) | Escherichia_coli.fna | NODE_103_length_9781_cov_690.322640 | 9781 | QUATERNARY AMMONIUM |
| P81BT0071 | sul1 | bin_1 | plasmid | f__Enterobacteriaceae (UID5103) (bin_1) | Escherichia_coli.fna | NODE_103_length_9781_cov_690.322640 | 9781 | SULFONAMIDE |
| P81BT0071 | tet(B) | bin_2 | plasmid | root (UID1) (bin_2) | Escherichia_coli_LR09.fna | NODE_157_length_5688_cov_28.839340 | 5688 | TETRACYCLINE |
| P81BT0071 | dfrA12 | bin_1 | plasmid | f__Enterobacteriaceae (UID5103) (bin_1) | Escherichia_coli.fna | NODE_103_length_9781_cov_690.322640 | 9781 | TRIMETHOPRIM |
| P81BT0071 | dfrA17 | bin_2 | plasmid | root (UID1) (bin_2) | Escherichia_coli_LR09.fna | NODE_361_length_1608_cov_36.948487 | 1608 | TRIMETHOPRIM |

**Supplementary data 8: AST data for select enteric MDR bacteria identified as *E.coli*, *Klebsiella pneumoniae* or *Enterococcus faecium* isolated from stool, and corresponding AMR genes from enriched stool sample resistomes.**

**
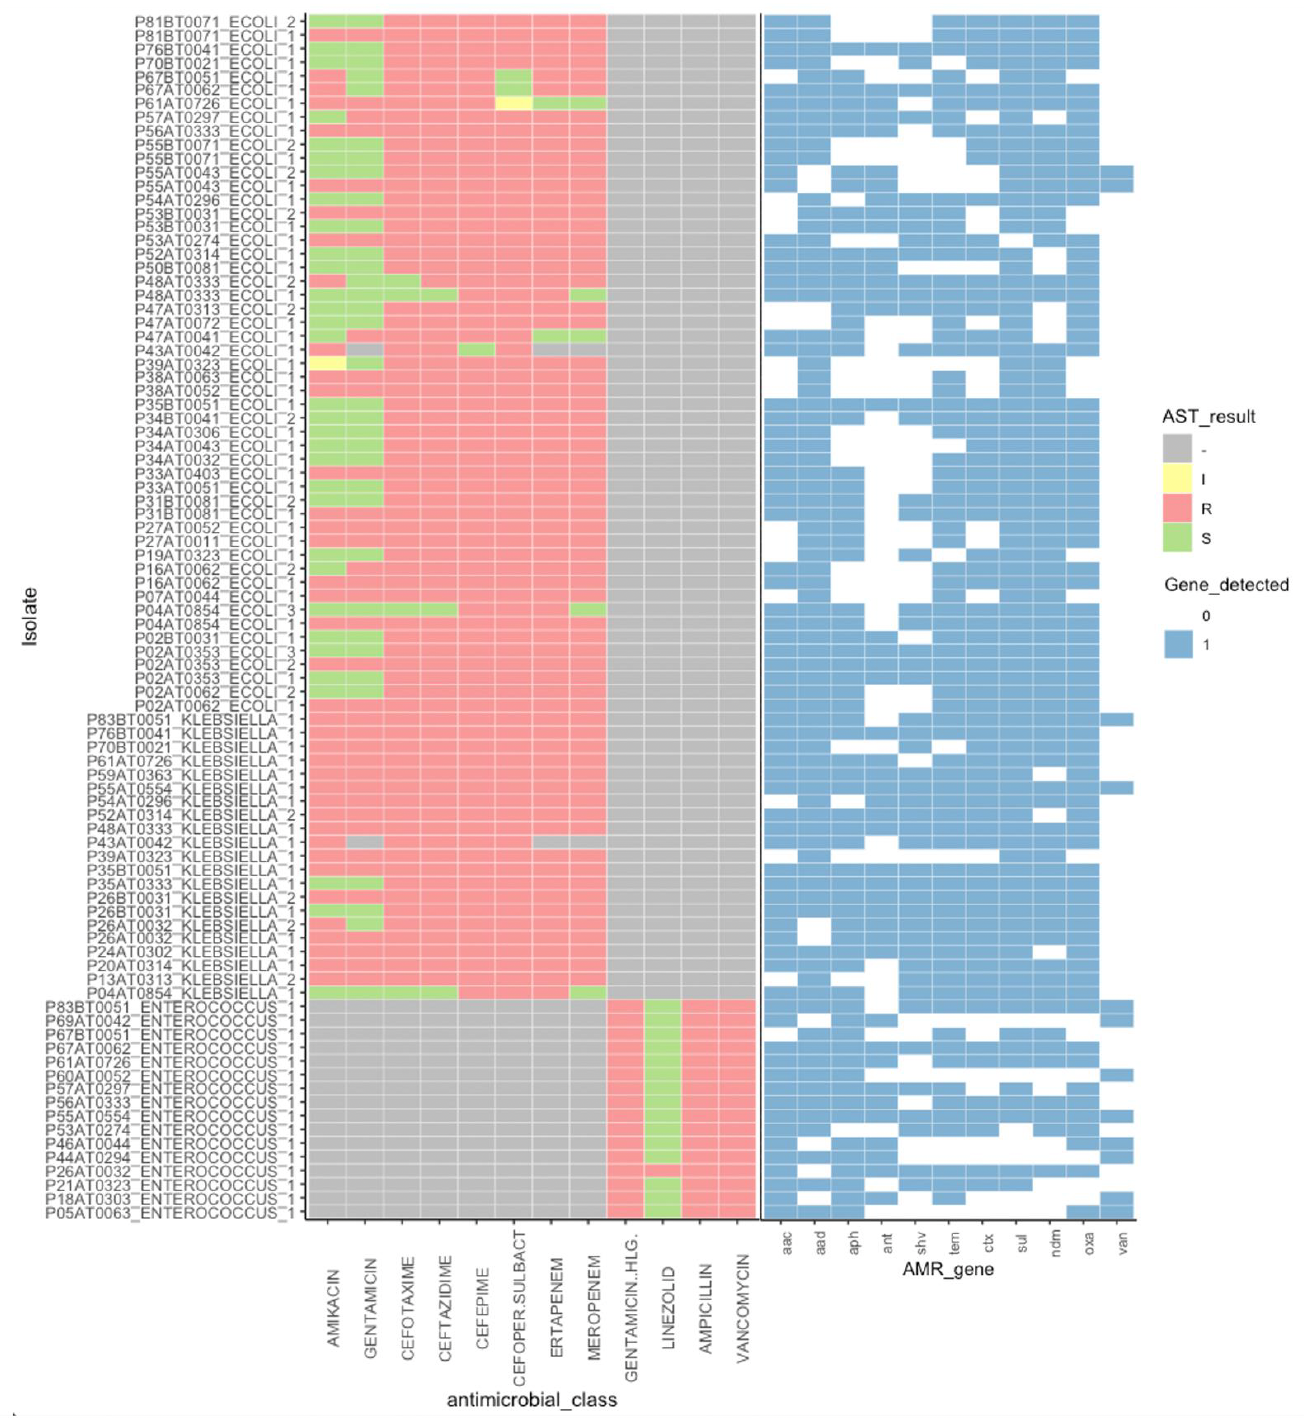
**

**Antimicrobial susceptibility testing results (left) and non-efflux AMR genes which could be linked with mediating resistance to the antimicrobials tested against (right).** AST results: S – sensitive, I – intermediate, R – resistant. Greyed out boxes indicate that the isolates were not tested against that antimicrobial. Blue coloured boxes indicate that the AMR gene was present, and white denotes absence. The figure shows antibiograms for each of the 90 isolates classified as MDR, grouped by organism, next to the most common AMR genes that could be associated with the resistance phenotype. Note that the AMR gene detection was conducted using metagenomic scaffolds constructed from the enriched microbiome data instead of the consensus genome bins, so the resistome is repeated in cases where two or three MDR isolates were detected in the same sample. Furthermore, while the AMR genes depicted were selected for their prominent roles in conferring resistance to the depicted antimicrobial classes, these genes do not constitute an exhaustive list and neither does their presence alone guarantee expression of the corresponding phenotype. The 90 enteric MDR isolates were detected across 57 unique samples from 41 patients, suggesting that over half of the patients (50.6%) included in the HSCT cohort had at least one MDR organism isolated from their stool during the transplant timeline. Five samples (P02AT0353, P04AT0854, P26AT0032, P48AT0333 and P61AT0726) each had three MDR organisms isolated from them, all collected post-HSCT. In general, isolated *Klebsiella* spp. possessed phenotypic resistance to a broader range of antimicrobial classes, also reflected in the resistomes of samples containing the organism. At least one aminoglycoside resistance gene was identified in all 90 samples, despite most *E. coli* showing susceptibility to amikacin and gentamicin.

**Supplementary data 9: Antimicrobial sensitivity and AMR gene profiles for 5 BSI isolates co-detected in the gut**

|  | **P02AT005BP2** | **P05AT014BA1** | **P14AT043BA1** | **P44AT012BA1** | **P55BT045BA1** |
| --- | --- | --- | --- | --- | --- |
|  | ***E.coli*** | ***E.faecium*** | ***K.pneumoniae*** | ***P.aeruginosa*** | ***K.pneumoniae*** |
| **Antimicobials tested** | **AST** | | | | |
| Piperacillin/tazobactam | R |  | Participant died before AST was performed | R | R |
| Netilmicin | R |  | R | R |
| Meropenem | R |  | R | R |
| Gentamicin | R | R |  | R |
| Ciprofloxacin |  |  |  | R |
| Amikacin | R |  | R | R |
| Cefoperazone/sulbactam | R |  | R | R |
| Ertapenem |  |  |  | R |
| Cefotaxime |  |  |  | R |
| Ceftazidime | R |  | R | R |
| Tigecycline | R |  |  |  |
| Cefepime |  |  | R |  |
| Levofloxacin |  | R | R |  |
| Aztreonam |  |  | R |  |
| Ampicillin |  | R |  |  |
| Vancomycin |  | R |  |  |
| Linezolid |  | S |  |  |
| **AMR gene drug classes** | **AMR gene detection** | | | | |
| Aminoglycoside | 2 | 5 | 4 | 7 | 3 |
| Cephalosporin | 1 | 0 | 0 | 1 | 0 |
| Cephalosporin; penam | 0 | 0 | 1 | 0 | 1 |
| Cephamycin | 1 | 0 | 0 | 0 | 0 |
| Diaminopyrimidine | 1 | 1 | 1 | 1 | 1 |
| Fluoroquinolone | 1 | 0 | 1 | 1 | 1 |
| Glycopeptide | 0 | 1 | 0 | 0 | 0 |
| Glycylcycline; tetracycline | 0 | 1 | 0 | 0 | 0 |
| Lincosamide | 0 | 2 | 0 | 0 | 1 |
| Macrolide | 1 | 2 | 2 | 0 | 1 |
| Macrolide; streptogramin | 0 | 1 | 1 | 1 | 0 |
| Multidrug | 4 | 4 | 4 | 5 | 5 |
| Nucleoside | 0 | 1 | 0 | 0 | 0 |
| Peptide | 4 | 0 | 3 | 1 | 3 |
| Phenicol | 0 | 1 | 1 | 1 | 1 |
| Phosphonic acid | 0 | 1 | 1 | 1 | 1 |
| Rifamycin | 0 | 0 | 1 | 0 | 1 |
| Sulfonamide | 1 | 1 | 1 | 2 | 1 |
| Tetracycline | 0 | 3 | 1 | 0 | 0 |
